# Supplementary material for: Reasons for reported suspicion of child maltreatment and responses from the child welfare - a cross-sectional study of Norwegian public dental health personnel
Source: PubMed Central journal article supplement (PMC5833052; doi:10.1186/s12903-018-0490-x), 2018-03-02
Supplement: 12903_2018_490_MOESM1_ESM.pdf [file 12903_2018_490_MOESM1_ESM.pdf]

## **Velkommen til spørreundersøkelsen: Tannhelse og barnevern -samhandling til beste for barnet**

*Hjertelig takk for at du vil delta i studien.*

*Dine erfaringer som tannhelsepersonell er et viktig bidrag for at vi sammen kan generere forskningsbasert kunnskap som kommer tannhelsetjenesten og utsatte barn til gode.*

*Spørreundersøkelsen er begrenset til å ta ca. 30 til 40 minutter. Noen spørsmål kan oppleves like, men de fanger opp ulike aspekter og alle svar er viktige.*

*Vi setter stor pris på at du deltar i denne studien, sammen kan vi øke kunnskapen!*

*Hjertelig takk!*

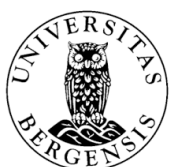

UNIVERSITETET I BERGEN  
HEMIL-senteret  
Senter for forskning om helsefremmende  
arbeid, miljø og livsstil

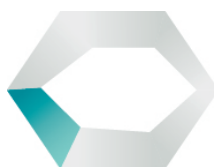

Tannhelsetjenestens  
**kompetansesenter**  
Vest / Hordaland

**De første spørsmålene er knyttet opp mot dine holdninger til å sende bekymringsmelding til barnevernet ved mistanke om barnemishandling eller omsorgssvikt.**

|                                                                                                                                           | helt uenig            | uenig                 | verken enig eller uenig | enig                  | helt enig             |
|-------------------------------------------------------------------------------------------------------------------------------------------|-----------------------|-----------------------|-------------------------|-----------------------|-----------------------|
| Som tannhelsepersonell føler jeg et profesjonelt ansvar for å sende bekymringsmelding ved mistanke om barnemishandling eller omsorgssvikt | <input type="radio"/> | <input type="radio"/> | <input type="radio"/>   | <input type="radio"/> | <input type="radio"/> |
| Personlig føler jeg et etisk ansvar for å sende bekymringsmelding ved mistanke om barnemishandling eller omsorgssvikt                     | <input type="radio"/> | <input type="radio"/> | <input type="radio"/>   | <input type="radio"/> | <input type="radio"/> |
| Jeg føler et yrkesansvar for å sende en bekymringsmelding ved mistanke om barnemishandling eller omsorgssvikt                             | <input type="radio"/> | <input type="radio"/> | <input type="radio"/>   | <input type="radio"/> | <input type="radio"/> |

**Dersom jeg i løpet av de neste 12 måneder, sendte bekymringsmelding ved mistanke om barnemishandling eller omsorgssvikt, ville jeg ...**

|                                                                                                    | helt uenig            | uenig                 | verken enig eller uenig | enig                  | helt enig             |
|----------------------------------------------------------------------------------------------------|-----------------------|-----------------------|-------------------------|-----------------------|-----------------------|
| følt at bekymringsmeldingen ville beskytte barnet mot videre skade                                 | <input type="radio"/> | <input type="radio"/> | <input type="radio"/>   | <input type="radio"/> | <input type="radio"/> |
| vært bekymret for den umiddelbare sikkerheten til barnet                                           | <input type="radio"/> | <input type="radio"/> | <input type="radio"/>   | <input type="radio"/> | <input type="radio"/> |
| vært bekymret for den negative påvirkningen dette ville få for mitt forhold til barnet             | <input type="radio"/> | <input type="radio"/> | <input type="radio"/>   | <input type="radio"/> | <input type="radio"/> |
| vært veldig stresset for å ha sendt en bekymringsmelding                                           | <input type="radio"/> | <input type="radio"/> | <input type="radio"/>   | <input type="radio"/> | <input type="radio"/> |
| vært bekymret for hvor mye av min arbeidstid dette ville ta                                        | <input type="radio"/> | <input type="radio"/> | <input type="radio"/>   | <input type="radio"/> | <input type="radio"/> |
| følt at jeg hadde handlet riktig overfor barnet                                                    | <input type="radio"/> | <input type="radio"/> | <input type="radio"/>   | <input type="radio"/> | <input type="radio"/> |
| vært i tvil om barnevernstjenesten er i stand til å respondere passende på min bekymringsmelding   | <input type="radio"/> | <input type="radio"/> | <input type="radio"/>   | <input type="radio"/> | <input type="radio"/> |
| vært bekymret for at min bekymringsmelding ikke er godt nok begrunnet i henhold til bevis          | <input type="radio"/> | <input type="radio"/> | <input type="radio"/>   | <input type="radio"/> | <input type="radio"/> |
| følt at jeg bidrog til å redusere omfanget av barnemishandling og omsorgssvikt i vårt lokalsamfunn | <input type="radio"/> | <input type="radio"/> | <input type="radio"/>   | <input type="radio"/> | <input type="radio"/> |
| følt at dette ville gjøre situasjonen verre for barnet                                             | <input type="radio"/> | <input type="radio"/> | <input type="radio"/>   | <input type="radio"/> | <input type="radio"/> |
| følt at jeg gjorde min plikt                                                                       | <input type="radio"/> | <input type="radio"/> | <input type="radio"/>   | <input type="radio"/> | <input type="radio"/> |
| følt at jeg har tatt barnet på alvor                                                               | <input type="radio"/> | <input type="radio"/> | <input type="radio"/>   | <input type="radio"/> | <input type="radio"/> |

**Dersom jeg i løpet av de neste 12 måneder, sendte en bekymringsmelding ved mistanke om barnemishandling eller omsorgssvikt, og bekymringen viste seg å være grunnløs...**

|                                                                                         | helt uenig            | uenig                 | verken enig eller uenig | enig                  | helt enig             |
|-----------------------------------------------------------------------------------------|-----------------------|-----------------------|-------------------------|-----------------------|-----------------------|
| ville jeg bekymret meg for de negative konsekvensene dette kunne få for meg             | <input type="radio"/> | <input type="radio"/> | <input type="radio"/>   | <input type="radio"/> | <input type="radio"/> |
| ville jeg bekymret meg for de negative konsekvensene dette kunne få for tannklinikken   | <input type="radio"/> | <input type="radio"/> | <input type="radio"/>   | <input type="radio"/> | <input type="radio"/> |
| ville jeg bekymret meg for de negative konsekvensene dette kunne få for barnets familie | <input type="radio"/> | <input type="radio"/> | <input type="radio"/>   | <input type="radio"/> | <input type="radio"/> |

**Dersom jeg i løpet av de neste 12 måneder, sendte en bekymringsmelding ved mistanke om at noen i barnets familie utøvde barnemishandling eller omsorgssvikt, ville jeg...**

|                                                                                                     | helt uenig            | uenig                 | verken enig eller uenig | enig                  | helt enig             |
|-----------------------------------------------------------------------------------------------------|-----------------------|-----------------------|-------------------------|-----------------------|-----------------------|
| vært bekymret for hvilken innvirkning dette ville få for mitt forhold til barnets foreldre          | <input type="radio"/> | <input type="radio"/> | <input type="radio"/>   | <input type="radio"/> | <input type="radio"/> |
| tenkt at jeg handlet riktig                                                                         | <input type="radio"/> | <input type="radio"/> | <input type="radio"/>   | <input type="radio"/> | <input type="radio"/> |
| vært bekymret for hvilke konsekvenser dette ville få for barnets foreldre og andre familiemedlemmer | <input type="radio"/> | <input type="radio"/> | <input type="radio"/>   | <input type="radio"/> | <input type="radio"/> |
| tenkt at dette, på lang sikt, ville bidra til å forbedre situasjonen for barnets familie            | <input type="radio"/> | <input type="radio"/> | <input type="radio"/>   | <input type="radio"/> | <input type="radio"/> |

**Dersom jeg i løpet av de neste 12 måneder unnlot å sende en bekymringsmelding ved mistanke om barnemishandling eller omsorgssvikt..**

|                                                                                                                                     | helt uenig            | uenig                 | verken enig eller uenig | enig                  | helt enig             |
|-------------------------------------------------------------------------------------------------------------------------------------|-----------------------|-----------------------|-------------------------|-----------------------|-----------------------|
| ville jeg blitt så bekymret for barnet at jeg ville hatt problemer med å få sove om natten                                          | <input type="radio"/> | <input type="radio"/> | <input type="radio"/>   | <input type="radio"/> | <input type="radio"/> |
| ville jeg bekymret meg for hvilke juridiske konsekvenser dette kunne få for meg                                                     | <input type="radio"/> | <input type="radio"/> | <input type="radio"/>   | <input type="radio"/> | <input type="radio"/> |
| og barnet fortsatte å bli mishandlet eller utsatt for omsorgssvikt, ville jeg ha angret på at jeg ikke hadde meldt inn min mistanke | <input type="radio"/> | <input type="radio"/> | <input type="radio"/>   | <input type="radio"/> | <input type="radio"/> |

**De påfølgende spørsmål omhandler hva du tenker rundt det å sende en bekymringsmelding ved mistanke om at en av dine pasienter er utsatt for barnemishandling eller omsorgssvikt de neste 12 måneder.**

**Å sende bekymringsmelding ved mistanke om barnemishandling eller omsorgssvikt de neste 12 mnd. er...**

- helt uviktig
- uviktig
- verken uviktig eller viktig
- viktig
- veldig viktig

**Å sende bekymringsmelding ved mistanke om barnemishandling eller omsorgssvikt de neste 12 mnd er...**

- helt unyttig
  - unyttig
  - verken nyttig eller unyttig
  - nyttig
  - veldig nyttig
- 

**Å sende bekymringsmelding ved mistanke om barnemishandling eller omsorgssvikt de neste 12 mnd. er...**

- helt feil
  - feil
  - verken feil eller rett
  - riktig
  - helt riktig
- 

**Å sende bekymringsmelding ved mistanke om barnemishandling eller omsorgssvikt den neste 12 mnd. er...**

- veldig uklokt
  - uklokt
  - verken uklokt eller klokt
  - klokt
  - veldig klokt
- 

**Å sende bekymringsmelding ved mistanke om barnemishandling eller omsorgssvikt de neste 12 mnd. er...**

- veldig vanskelig
  - vanskelig
  - verken lett eller vanskelig
  - lett
  - veldig lett
- 

**Å sende bekymringsmelding ved mistanke om barnemishandling eller omsorgssvikt de neste 12 mnd. er...**

- veldig belastende
  - belastende
  - verken belastende eller enkelt
  - enkelt
  - veldig enkelt
- 

**Å sende bekymringsmelding ved mistanke om barnemishandling eller omsorgssvikt de neste 12 mnd. er...**

- veldig ubehagelig
  - ubehagelig
  - verken ubehagelig eller behagelig
  - behagelig
  - veldig behagelig
-

## Å sende bekymringsmelding ved mistanke om barnemishandling eller omsorgssvikt de neste 12 mnd. er...

- veldig krevende
- krevende
- verken krevende eller en smal sak
- en smal sak
- en veldig smal sak

**De neste spørsmål omhandler din oppfatning av hva hva personer i ditt sosiale miljø og arbeidsmiljø mener når det gjelder å sende bekymringsmelding.**

### Dersom jeg i løpet av de neste 12 måneder mistenker barnemishandling eller omsorgssvikt...

|                                                                                                                           | helt uenig            | uenig                 | verken enig eller uenig | enig                  | helt enig             |
|---------------------------------------------------------------------------------------------------------------------------|-----------------------|-----------------------|-------------------------|-----------------------|-----------------------|
| mener mine kollegaer på tannklinikken at jeg skal sende bekymringsmelding                                                 | <input type="radio"/> | <input type="radio"/> | <input type="radio"/>   | <input type="radio"/> | <input type="radio"/> |
| synes min klinikkssjef at jeg skal sende bekymringsmelding                                                                | <input type="radio"/> | <input type="radio"/> | <input type="radio"/>   | <input type="radio"/> | <input type="radio"/> |
| mener ledergruppen i tannhelsetjenesten (fylkestannlege/direktør/overstannleger etc.) at jeg skal sende bekymringsmelding | <input type="radio"/> | <input type="radio"/> | <input type="radio"/>   | <input type="radio"/> | <input type="radio"/> |
| mener de fleste personer som er viktige for meg at jeg skal sende bekymringsmelding                                       | <input type="radio"/> | <input type="radio"/> | <input type="radio"/>   | <input type="radio"/> | <input type="radio"/> |
| er det forventet av meg å sende bekymringsmelding                                                                         | <input type="radio"/> | <input type="radio"/> | <input type="radio"/>   | <input type="radio"/> | <input type="radio"/> |

### Dersom jeg i løpet av de neste 12 måneder sendte en bekymringsmelding ved mistanke om barnemishandling eller omsorgssvikt, ville jeg fått støtte fra...

|                                                                                 | helt uenig            | uenig                 | verken enig eller uenig | enig                  | helt enig             |
|---------------------------------------------------------------------------------|-----------------------|-----------------------|-------------------------|-----------------------|-----------------------|
| mine kollegaer på tannklinikken                                                 | <input type="radio"/> | <input type="radio"/> | <input type="radio"/>   | <input type="radio"/> | <input type="radio"/> |
| min klinikkssjef (evt annen nærmeste leder)                                     | <input type="radio"/> | <input type="radio"/> | <input type="radio"/>   | <input type="radio"/> | <input type="radio"/> |
| ledergruppen i tannhelsetjenesten (fylkestannlege/direktør/overstannleger etc.) | <input type="radio"/> | <input type="radio"/> | <input type="radio"/>   | <input type="radio"/> | <input type="radio"/> |
| de fleste personer som er viktige for meg                                       | <input type="radio"/> | <input type="radio"/> | <input type="radio"/>   | <input type="radio"/> | <input type="radio"/> |
| personer som er lik meg                                                         | <input type="radio"/> | <input type="radio"/> | <input type="radio"/>   | <input type="radio"/> | <input type="radio"/> |

**De påfølgende spørsmål omhandler hvordan du opplever det å sende en bekymringsmelding ved mistanke om at en av dine pasienter er utsatt for barnemishandling eller omsorgssvikt de neste 12 måneder.**

**Dersom jeg i løpet av de neste 12 måneder får mistanke om barnemishandling eller omsorgssvikt...**

|                                                                            | helt uenig            | uenig                 | verken uenig eller enig | enig                  | helt enig             |
|----------------------------------------------------------------------------|-----------------------|-----------------------|-------------------------|-----------------------|-----------------------|
| er jeg svært usikker på om jeg er i stand til å sende en bekymringsmelding | <input type="radio"/> | <input type="radio"/> | <input type="radio"/>   | <input type="radio"/> | <input type="radio"/> |
| er jeg helt trygg på at jeg kan sende en bekymringsmelding                 | <input type="radio"/> | <input type="radio"/> | <input type="radio"/>   | <input type="radio"/> | <input type="radio"/> |
| har jeg full mulighet til å sende en bekymringsmelding                     | <input type="radio"/> | <input type="radio"/> | <input type="radio"/>   | <input type="radio"/> | <input type="radio"/> |
| vil det være veldig vanskelig å sende en bekymringsmelding                 | <input type="radio"/> | <input type="radio"/> | <input type="radio"/>   | <input type="radio"/> | <input type="radio"/> |

**Dersom jeg i løpet av de neste 12 måneder, får mistanke om barnemishandling eller omsorgssvikt...**

|                                                                                          | helt uenig            | uenig                 | verken enig eller uenig | enig                  | helt enig             |
|------------------------------------------------------------------------------------------|-----------------------|-----------------------|-------------------------|-----------------------|-----------------------|
| er det få utenforliggende faktorene som kan forhindre meg i å sende en bekymringsmelding | <input type="radio"/> | <input type="radio"/> | <input type="radio"/>   | <input type="radio"/> | <input type="radio"/> |
| har jeg full kontroll på det å sende en bekymringsmelding                                | <input type="radio"/> | <input type="radio"/> | <input type="radio"/>   | <input type="radio"/> | <input type="radio"/> |
| ligger avgjørelsen om å sende en bekymringsmelding utenfor min kontroll                  | <input type="radio"/> | <input type="radio"/> | <input type="radio"/>   | <input type="radio"/> | <input type="radio"/> |
| er det helt opp til meg om jeg vil sende en bekymringsmelding eller ikke                 | <input type="radio"/> | <input type="radio"/> | <input type="radio"/>   | <input type="radio"/> | <input type="radio"/> |

**De påfølgende spørsmål omhandler din oppfatning av i hvilken grad viktige personer sender en bekymringsmelding ved mistanke om at en av deres pasienter er utsatt for barnemishandling eller omsorgssvikt de neste 12 måneder.**

**Følgene personer sender alltid bekymringsmelding ved mistanke om barnemishandling eller omsorgssvikt.**

|                                           | helt uenig            | uenig                 | verken enig eller uenig | enig                  | helt enig             |
|-------------------------------------------|-----------------------|-----------------------|-------------------------|-----------------------|-----------------------|
| mine kollegaer på tannklinikken           | <input type="radio"/> | <input type="radio"/> | <input type="radio"/>   | <input type="radio"/> | <input type="radio"/> |
| min klinikkssjef                          | <input type="radio"/> | <input type="radio"/> | <input type="radio"/>   | <input type="radio"/> | <input type="radio"/> |
| de fleste personer i min situasjon        | <input type="radio"/> | <input type="radio"/> | <input type="radio"/>   | <input type="radio"/> | <input type="radio"/> |
| de fleste personer som er viktige for meg | <input type="radio"/> | <input type="radio"/> | <input type="radio"/>   | <input type="radio"/> | <input type="radio"/> |
| de fleste personer lik meg                | <input type="radio"/> | <input type="radio"/> | <input type="radio"/>   | <input type="radio"/> | <input type="radio"/> |

**Tannhelsepersonell opplever ofte at det kan være vanskelig å sende en bekymringsmelding når man mistenker barnemishandling eller omsorgssvikt. De neste spørsmål omhandler hvordan du opplever det å sende en bekymringsmelding i ulike situasjoner.**

**Vennligst kryss av hvor vanskelig eller enkelt det vil være for deg å sende en bekymringsmelding, i løpet av de neste 12 måneder, ved mistanke om barnemishandling eller omsorgssvikt i påfølgende situasjoner.**

|                                                                                                                   | veldig vanskelig      | vanskelig             | verken enkelt eller vanskelig | enkelt                | veldig enkelt         |
|-------------------------------------------------------------------------------------------------------------------|-----------------------|-----------------------|-------------------------------|-----------------------|-----------------------|
| når din mistanke er basert på opplysninger fra et barn                                                            | <input type="radio"/> | <input type="radio"/> | <input type="radio"/>         | <input type="radio"/> | <input type="radio"/> |
| når din mistanke er basert på mange bevis                                                                         | <input type="radio"/> | <input type="radio"/> | <input type="radio"/>         | <input type="radio"/> | <input type="radio"/> |
| når din mistanke er basert på lite bevis                                                                          | <input type="radio"/> | <input type="radio"/> | <input type="radio"/>         | <input type="radio"/> | <input type="radio"/> |
| når det er mange andre oppgaver som krever din tid                                                                | <input type="radio"/> | <input type="radio"/> | <input type="radio"/>         | <input type="radio"/> | <input type="radio"/> |
| når du føler at din klinikkssjef (evt annen nærmeste overordnede) ikke støtter deg i å sende en bekymringsmelding | <input type="radio"/> | <input type="radio"/> | <input type="radio"/>         | <input type="radio"/> | <input type="radio"/> |
| når du føler at dine kollegaer ikke støtter deg i å sende bekymringsmelding                                       | <input type="radio"/> | <input type="radio"/> | <input type="radio"/>         | <input type="radio"/> | <input type="radio"/> |
| når du kjenner barnets foreldre utenom tannklinikken                                                              | <input type="radio"/> | <input type="radio"/> | <input type="radio"/>         | <input type="radio"/> | <input type="radio"/> |

**Av ulike grunner er det ofte svært vanskelig å avgjøre om en skal sende bekymringsmelding eller ikke. De neste spørsmål omhandler din intensjon og spesifikke fremtidsplaner når det gjelder å sende bekymringsmelding ved mistanke om barnemishandling og omsorgssvikt.**

**I de neste 12 måneder har jeg til hensikt å sende bekymringsmelding til barnevernet, dersom jeg får mistanke om barnemishandling eller omsorgssvikt.**

- helt uenig
- uenig
- verken enig eller uenig
- enig
- helt enig

**Dersom jeg i de neste 12 måneder får mistanke om barnemishandling eller omsorgssvikt, vil jeg sende bekymringsmelding.**

- helt usikker
- usikker
- verken sikker eller usikker
- sikker
- helt sikker

**Dersom jeg i løpet av de neste 12 måneder får mistanke om barnemishandling eller omsorgssvikt, ønsker jeg å sende en bekymringsmelding.**

- helt uenig
- uenig
- verken uenig eller enig
- enig
- helt enig

**De neste spørsmål omhandler din mulighet for å kunne oppdage tegn og varselsignal på barnemishandling og omsorgssvikt.**

**I de neste 12 måneder, hvor usikker eller sikker føler du deg på å kunne oppfatte tegn på...**

|                      | veldig usikker        | usikker               | verken sikker eller usikker | sikker                | veldig sikker         |
|----------------------|-----------------------|-----------------------|-----------------------------|-----------------------|-----------------------|
| fysisk mishandling?  | <input type="radio"/> | <input type="radio"/> | <input type="radio"/>       | <input type="radio"/> | <input type="radio"/> |
| seksuelt misbruk?    | <input type="radio"/> | <input type="radio"/> | <input type="radio"/>       | <input type="radio"/> | <input type="radio"/> |
| psykisk mishandling? | <input type="radio"/> | <input type="radio"/> | <input type="radio"/>       | <input type="radio"/> | <input type="radio"/> |
| vanskjøtsel?         | <input type="radio"/> | <input type="radio"/> | <input type="radio"/>       | <input type="radio"/> | <input type="radio"/> |

**I de neste 12 måneder, hvor usikker eller sikker føler du deg på å kunne oppfatte tegn på barnemishandling og omsorgssvikt dersom...**

|                                                           | veldig usikker        | usikker               | verken sikker eller usikker | sikker                | veldig sikker         |
|-----------------------------------------------------------|-----------------------|-----------------------|-----------------------------|-----------------------|-----------------------|
| du har mange pasienter som trenger ekstra oppfølging?     | <input type="radio"/> | <input type="radio"/> | <input type="radio"/>       | <input type="radio"/> | <input type="radio"/> |
| du ikke har kollegaer tilgjengelig som kan assistere deg? | <input type="radio"/> | <input type="radio"/> | <input type="radio"/>       | <input type="radio"/> | <input type="radio"/> |
| du er overarbeidet?                                       | <input type="radio"/> | <input type="radio"/> | <input type="radio"/>       | <input type="radio"/> | <input type="radio"/> |
| du har det veldig travelt?                                | <input type="radio"/> | <input type="radio"/> | <input type="radio"/>       | <input type="radio"/> | <input type="radio"/> |



**De neste spørsmål omhandler dine fremtidige planer, ved mistanke om at en av dine pasienter er utsatt for barnemishandling eller omsorgssvikt.**

**Dersom du i løpet av de neste 12 måneder er bekymret for et barn, hvor usannsynlig eller sannsynlig er det at du kommer til å...**

|                                                                                                                                 | helt<br>usannsynlig   | usannsynlig           | verken<br>sannsynlig<br>eller<br>usannsynlig | sannsynlig            | helt<br>sannsynlig    |
|---------------------------------------------------------------------------------------------------------------------------------|-----------------------|-----------------------|----------------------------------------------|-----------------------|-----------------------|
| diskutere din bekymring med din klinikkssjef (nærmeste leder)?                                                                  | <input type="radio"/> | <input type="radio"/> | <input type="radio"/>                        | <input type="radio"/> | <input type="radio"/> |
| diskutere din bekymring med dine kollegaer?                                                                                     | <input type="radio"/> | <input type="radio"/> | <input type="radio"/>                        | <input type="radio"/> | <input type="radio"/> |
| diskutere din bekymring med andre aktører (helsestasjon, lege, skole, barnehage)?                                               | <input type="radio"/> | <input type="radio"/> | <input type="radio"/>                        | <input type="radio"/> | <input type="radio"/> |
| diskutere din bekymring med barnevernet?                                                                                        | <input type="radio"/> | <input type="radio"/> | <input type="radio"/>                        | <input type="radio"/> | <input type="radio"/> |
| søke informasjon om hvordan gjenkjenne indikasjoner på barnemishandling og omsorgssvikt gjennom faglitteratur, internett, etc.? | <input type="radio"/> | <input type="radio"/> | <input type="radio"/>                        | <input type="radio"/> | <input type="radio"/> |
| sende bekymringsmelding?                                                                                                        | <input type="radio"/> | <input type="radio"/> | <input type="radio"/>                        | <input type="radio"/> | <input type="radio"/> |

**De neste spørsmål omhandler dine tidligere erfaringer med å rapportere mistanke om barnemishandling og omsorgssvikt. Her menes de tilfeller du har blitt bekymret og det er blitt sendt en bekymringsmelding på bakgrunn av din bekymring (innbefatter også dersom klinikkssjef/sekretær/ressursperson evt. andre har sendt på vegne av deg).**

**I løpet av den tiden du har arbeidet som tannhelsepersonell, har du sendt bekymringsmelding ved mistanke om barnemishandling eller omsorgssvikt?**

*Her menes de tilfeller der det er blitt sendt en bekymringsmelding på bakgrunn av din bekymring (innbefatter også dersom klinikkssjef/sekretær/ evt. andre har sendt på vegne av deg).*

ja

Hvor mange ganger har du sendt

bekymringsmelding? Skriv inn

siffer

nei

**Ble noen av disse bekymringsmedlingene sendt i tidsrommet fra og med 2012 og frem til i dag?**

ja

nei

## Hvor mange bekymringsmeldinger har du sendt i tidsrommet fra og med 2012 og frem til i dag?

Her menes de tilfeller der det er blitt sendt en bekymringsmelding på bakgrunn av din bekymring (innbefatter også dersom klinikkssjef/sekretær evt. andre har sendt på vegne av deg).

- en bekymringsmelding
  - to bekymringsmeldinger
  - tre bekymringsmeldinger
  - fire bekymringsmeldinger
  - fem bekymringsmeldinger
  - seks bekymringsmeldinger
  - syv bekymringsmeldinger
  - åtte bekymringsmeldinger
  - ni bekymringsmeldinger
  - ti bekymringsmeldinger eller flere
- 

**De neste spørsmålene omhandler den første bekymringsmeldingen du sendte fra og med 2012.**

### Hvilket kjønn hadde barnet på den første bekymringsmeldingen du sendte?

- gutt
  - jente
- 

### Hvilken alder hadde barnet på den første bekymringsmeldingen du sendte?

- 0 - 3 år
  - 4 - 7 år
  - 8 - 11 år
  - 12 - 15 år
  - 16 -
- 

### Hadde den ene eller begge foreldrene til barnet du sendte første bekymringsmelding på utenlandsk opprinnelse?

- ja
  - nei
  - vet ikke
-

## Hva var årsaken til den første bekymringsmeldingen du sendte?

Flere kategorier kan velges.

- mistanke om fysisk mishandling
- mistanke om seksuelt misbruk
- mistanke om psykisk mishandling
- mistanke om vanskjøtsel
- gjentakende ikke møtt til time
- grav karies
- gingivitt
- mangelfull hygiene
- sår og lesjoner i munnhulen
- traume
- andre orale funn

vennligst noter

- behandlingsvegring
- samspill med foresatte
- unormal oppførsel hos barnet
- annet

vennligst noter

---

## Hvilken tilbakemelding har du fått fra barnevernet på den første bekymringsmeldingen du sendte?

- barnevernet har åpnet undersøkelse, og iverksett tiltak
- barnevernet har åpnet undersøkelse, men henlagt senere
- barnevernet har åpnet undersøkelse, men ikke gitt tilbakemelding om det er iverksatt tiltak eller om saken er henlagt
- barnevernet har ikke åpnet undersøkelse. Saken henlagt
- barnevernet har ikke gitt noen tilbakemelding
- annet

vennligst noter

- vet ikke

---

**De neste spørsmålene omhandler den andre  
bekymringsmeldingen du sendte fra og med 2012.**

**Hvilket kjønn hadde barnet på den andre  
bekymringsmeldingen du sendte?**

- jente  
 gutt
- 

**Hvilken alder hadde barnet på den andre  
bekymringsmeldingen du sendte?**

- 0 - 3 år  
 4 - 7 år  
 8 - 11 år  
 12 - 15 år  
 16 -
- 

**Hadde den ene eller begge foreldrene til barnet du sendte  
<u>andre</u> bekymringsmelding på utenlandsk opprinnelse?**

- ja  
 nei  
 vet ikke
-

## Hva var årsaken til den andre bekymringsmeldingen du sendte?

Flere kategorier kan velges.

- mistanke om fysisk mishandling
- mistanke om seksuelt misbruk
- mistanke om psykisk mishandling
- mistanke om vanskjøtsel
- gjentakende ikke møtt til time
- grav karies
- gingivitt
- mangelfull hygiene
- sår og lesjoner i munnhulen
- traume
- andre orale funn

vennligst noter

- behandlingsvegring
- samspill med foresatte
- unormal oppførsel hos barnet
- annet

vennligst noter

---

## Hvilken tilbakemelding har du fått fra barnevernet på den andre bekymringsmeldingen du sendte?

- barnevernet har åpnet undersøkelse, og iverksett tiltak
- barnevernet har åpnet undersøkelse, men henlagt senere
- barnevernet har åpnet undersøkelse, men ikke gitt tilbakemelding om det er iverksatt tiltak eller om saken er henlagt
- barnevernet har ikke åpnet undersøkelse. Saken henlagt
- barnevernet har ikke gitt noen tilbakemelding
- annet

vennligst noter

- vet ikke

**De neste spørsmålene omhandler den tredje  
bekymringsmeldingen du sendte fra og med 2012.**

**Hvilket kjønn hadde barnet på den tredje  
bekymringsmeldingen du sendte?**

- jente
  - gutt
- 

**Hvilken alder hadde barnet på den tredje  
bekymringsmeldingen du sendte?**

- 0 - 3 år
  - 4 - 7 år
  - 8 - 11 år
  - 12 - 15 år
  - 16 -
- 

**Hadde den ene eller begge foreldrene til barnet du sendte  
tredje bekymringsmelding på utenlandsk opprinnelse?**

- ja
  - nei
  - vet ikke
-

## Hva var årsaken til den tredje bekymringsmeldingen du sendte?

Flere kategorier kan velges.

- mistanke om fysisk mishandling
- mistanke om seksuelt misbruk
- mistanke om psykisk mishandling
- mistanke om vanskjøtsel
- gjentakende ikke møtt til time
- grav karies
- gingivitt
- mangelfull hygiene
- sår og lesjoner i munnhulen
- traume
- andre orale funn

vennligst noter

- behandlingsvegring
- samspill med foresatte
- unormal oppførsel hos barnet
- annet

vennligst noter

---

## Hvilken tilbakemelding har du fått fra barnevernet på den tredje bekymringsmeldingen?

- barnevernet har åpnet undersøkelse, og iverksett tiltak
- barnevernet har åpnet undersøkelse, men henlagt senere
- barnevernet har åpnet undersøkelse, men ikke gitt tilbakemelding om det er iverksatt tiltak eller om saken er henlagt
- barnevernet har ikke åpnet undersøkelse. Saken henlagt
- barnevernet har ikke gitt noen tilbakemelding
- annet

vennligst noter

- vet ikke

**De neste spørsmålene omhandler den fjerde  
bekymringsmeldingen du sendte fra og med 2012.**

**Hvilket kjønn hadde barnet på den fjerde  
bekymringsmeldingen du sendte?**

- jente
  - gutt
- 

**Hvilken alder hadde barnet på den fjerde  
bekymringsmeldingen du sendte?**

- 0 - 3 år
  - 4 - 7 år
  - 8 - 11 år
  - 12 - 15 år
  - 16 -
- 

**Hadde den ene eller begge foreldrene til barnet du sendte  
fjerde bekymringsmelding på utenlandsk opprinnelse?**

- ja
  - nei
  - vet ikke
-



## Hva var årsaken til den fjerde bekymringsmeldingen du sendte?

Flere kategorier kan velges.

- mistanke om fysisk mishandling
- mistanke om seksuelt misbruk
- mistanke om psykisk mishandling
- mistanke om vanskjøtsel
- gjentakende ikke møtt til time
- grav karies
- gingivitt
- mangelfull hygiene
- sår og lesjoner i munnhulen
- traume
- andre orale funn

vennligst noter

- behandlingsvegring
- samspill med foresatte
- unormal oppførsel hos barnet
- annet

vennligst noter

---

## Hvilken tilbakemelding har du fått fra barnevernet på den fjerdebekymringsmeldingen du sendte?

- barnevernet har åpnet undersøkelse, og iverksett tiltak
- barnevernet har åpnet undersøkelse, men henlagt senere
- barnevernet har åpnet undersøkelse, men ikke gitt tilbakemelding om det er iverksatt tiltak eller om saken er henlagt
- barnevernet har ikke åpnet undersøkelse. Saken henlagt
- barnevernet har ikke gitt noen tilbakemelding
- annet

vennligst noter

- vet ikke

**De neste spørsmålene omhandler den femte  
bekymringsmeldingen du sendte fra og med 2012.**

**Hvilket kjønn hadde barnet på den femte  
bekymringsmeldingen du sendte?**

- jente
  - gutt
- 

**Hvilken alder hadde barnet på den femte  
bekymringsmeldingen du sendte?**

- 0 - 3 år
  - 4 - 7 år
  - 8 - 11 år
  - 12 - 15 år
  - 16 -
- 

**Hadde den ene eller begge foreldrene til barnet du sendte  
femte bekymringsmelding på utenlandsk opprinnelse?**

- ja
  - nei
  - vet ikke
-

## Hva var årsaken for den femte bekymringsmeldingen du sendte?

Flere kategorier kan velges.

- mistanke om fysisk mishandling
- mistanke om seksuelt misbruk
- mistanke om psykisk mishandling
- mistanke om vanskjøtsel
- gjentakende ikke møtt til time
- grav karies
- gingivitt
- mangelfull hygiene
- sår og lesjoner i munnhulen
- traume
- andre orale funn

vennligst noter

- behandlingsvegring
- samspill med foresatte
- unormal oppførsel hos barnet
- annet

vennligst noter

---

## Hvilken tilbakemelding har du fått fra barnevernet på den femte bekymringsmeldingen du sendte?

- barnevernet har åpnet undersøkelse, og iverksett tiltak
- barnevernet har åpnet undersøkelse, men henlagt senere
- barnevernet har åpnet undersøkelse, men ikke gitt tilbakemelding om det er iverksatt tiltak eller om saken er henlagt
- barnevernet har ikke åpnet undersøkelse. Saken henlagt
- barnevernet har ikke gitt noen tilbakemelding
- annet

vennligst noter

- vet ikke

**De neste spørsmålene omhandler den sjette  
bekymringsmeldingen du sendte fra og med 2012.**

**Hvilket kjønn hadde barnet på den  
sjette bekymringsmeldingen du sendte?**

- jente
  - gutt
- 

**Hvilken alder hadde barnet på den sjette  
bekymringsmeldingen du sendte?**

- 0 - 3 år
  - 4 - 7 år
  - 8 - 11 år
  - 12 - 15 år
  - 16 -
- 

**Hadde den ene eller begge foreldrene til barnet du sendte  
sjette bekymringsmelding på utenlandsk opprinnelse?**

- ja
  - nei
  - vet ikke
-

## Hva var årsaken til den sjette bekymringsmeldingen du sendte?

Flere kategorier kan velges.

- mistanke om fysisk mishandling
- mistanke om seksuelt misbruk
- mistanke om psykisk mishandling
- mistanke om vanskjøtsel
- gjentakende ikke møtt til time
- grav karies
- gingivitt
- mangelfull hygiene
- sår og lesjoner i munnhulen
- traume
- andre orale funn

vennligst noter

- behandlingsvegring
- samspill med foresatte
- unormal oppførsel hos barnet
- annet

vennligst noter

---

## Hvilken tilbakemelding har du fått fra barnevernet på den sjette bekymringsmeldingen du sendte?

- barnevernet har åpnet undersøkelse, og iverksett tiltak
- barnevernet har åpnet undersøkelse, men henlagt senere
- barnevernet har åpnet undersøkelse, men ikke gitt tilbakemelding om det er iverksatt tiltak eller om saken er henlagt
- barnevernet har ikke åpnet undersøkelse. Saken henlagt
- barnevernet har ikke gitt noen tilbakemelding
- annet

vennligst noter

- vet ikke

**De neste spørsmålene omhandler den syvende  
bekymringsmeldingen du sendte fra og med 2012.**

**Hvilket kjønn hadde barnet på den syvende  
bekymringsmeldingen du sendte?**

- jente
  - gutt
- 

**Hvilken alder hadde barnet på den syvende  
bekymringsmeldingen du sendte?**

- 0 - 3 år
  - 4 - 7 år
  - 8 - 11 år
  - 12 - 15 år
  - 16 -
- 

**Hadde den ene eller begge foreldrene til barnet du sendte  
syvende bekymringsmelding på utenlandsk opprinnelse?**

- ja
  - nei
  - vet ikke
-

## Hva var årsaken til den syvende bekymringsmeldingen du sendte?

Flere kategorier kan velges.

- mistanke om fysisk mishandling
- mistanke om seksuelt misbruk
- mistanke om psykisk mishandling
- mistanke om vanskjøtsel
- gjentakende ikke møtt til time
- grav karies
- gingivitt
- mangelfull hygiene
- sår og lesjoner i munnhulen
- traume
- andre orale funn

vennligst noter

- behandlingsvegring
- samspill med foresatte
- unormal oppførsel hos barnet
- annet

vennligst noter

---

## Hvilken tilbakemelding har du fått fra barnevernet på den syvende bekymringsmeldingen du sendte?

- barnevernet har åpnet undersøkelse, og iverksett tiltak
- barnevernet har åpnet undersøkelse, men henlagt senere
- barnevernet har åpnet undersøkelse, men ikke gitt tilbakemelding om det er iverksatt tiltak eller om saken er henlagt
- barnevernet har ikke åpnet undersøkelse. Saken henlagt
- barnevernet har ikke gitt noen tilbakemelding
- annet

vennligst noter

- vet ikke

**De neste spørsmålene omhandler den åttende  
bekymringsmeldingen du sendte fra og med 2012.**

**Hvilket kjønn hadde barnet på den åttende  
bekymringsmeldingen du sendte?**

- jente
  - gutt
- 

**Hvilken alder hadde barnet på den åttende  
bekymringsmeldingen du sendte?**

- 0 - 3 år
  - 4 - 7 år
  - 8 - 11 år
  - 12 - 15 år
  - 16 -
- 

**Hadde den ene eller begge foreldrene til barnet du sendte  
åttende bekymringsmelding på utenlandsk opprinnelse?**

- ja
  - nei
  - vet ikke
-



## Hva var årsaken til den åttende bekymringsmeldingen du?

Flere valg er mulig.

- mistanke om fysisk mishandling
- mistanke om seksuelt misbruk
- mistanke om psykisk mishandling
- mistanke om vanskjøtsel
- gjentakende ikke møtt til time
- grav karies
- gingivitt
- mangelfull hygiene
- sår og lesjoner i munnhulen
- traume
- andre orale funn

vennligst noter

- behandlingsvegring
- samspill med foresatte
- unormal oppførsel hos barnet
- annet

vennligst noter

---

## Hvilken tilbakemelding har du fått fra barnevernet på den åttende bekymringsmeldingen du sendte?

- barnevernet har åpnet undersøkelse, og iverksett tiltak
- barnevernet har åpnet undersøkelse, men henlagt senere
- barnevernet har åpnet undersøkelse, men ikke gitt tilbakemelding om det er iverksatt tiltak eller om saken er henlagt
- barnevernet har ikke åpnet undersøkelse. Saken henlagt
- barnevernet har ikke gitt noen tilbakemelding
- annet

vennligst noter

- vet ikke

**De neste spørsmålene omhandler den niende  
bekymringsmeldingen du sendte fra og med 2012.**

**Hvilket kjønn hadde barnet på den niende  
bekymringsmeldingen du sendte?**

- jente
  - gutt
- 

**Hvilken alder hadde barnet på den niende  
bekymringsmeldingen du sendte?**

- 0 - 3 år
  - 4 - 7 år
  - 8 - 11 år
  - 12 - 15 år
  - 16 -
- 

**Hadde den ene eller begge foreldrene til barnet du sendte  
niende bekymringsmelding på utenlandsk opprinnelse?**

- ja
  - nei
  - vet ikke
-

## Hva var årsaken til den niende bekymringsmeldingen du sendte?

Flere kategorier kan velges.

- mistanke om fysisk mishandling
- mistanke om seksuelt misbruk
- mistanke om psykisk mishandling
- mistanke om vanskjøtsel
- gjentakende ikke møtt til time
- grav karies
- gingivitt
- mangelfull hygiene
- sår og lesjoner i munnhulen
- traume
- andre orale funn

vennligst noter

- behandlingsvegring
- samspill med foresatte
- unormal oppførsel hos barnet
- annet

vennligst noter

---

## Hvilken tilbakemelding har du fått fra barnevernet på den niende bekymringsmeldingen du sendte?

- barnevernet har åpnet undersøkelse, og iverksett tiltak
- barnevernet har åpnet undersøkelse, men henlagt senere
- barnevernet har åpnet undersøkelse, men ikke gitt tilbakemelding om det er iverksatt tiltak eller om saken er henlagt
- barnevernet har ikke åpnet undersøkelse. Saken henlagt
- barnevernet har ikke gitt noen tilbakemelding
- annet

vennligst noter

- vet ikke

**De neste spørsmålene omhandler den tiende  
betryningsmeldingen du sendte fra og med 2012.**

**Hvilket kjønn hadde barnet på den tiende  
betryningsmeldingen du sendte?**

- jente  
 gutt
- 

**Hvilken alder hadde barnet på den tiende  
betryningsmeldingen du sendte?**

- 0 - 3 år  
 4 - 7 år  
 8 - 11 år  
 12 - 15 år  
 16 -
- 

**Hadde den ene eller begge foreldrene til barnet du sendte  
tiende betryningsmelding på utenlandsk opprinnelse?**

- ja  
 nei  
 vet ikke
-

## Hva var årsaken til den tiende bekymringsmeldingen du sendte?

Flere kategorier kan velges.

- mistanke om fysisk mishandling
- mistanke om seksuelt misbruk
- mistanke om psykisk mishandling
- mistanke om vanskjøtsel
- gjentakende ikke møtt til time
- grav karies
- gingivitt
- mangelfull hygiene
- sår og lesjoner i munnhulen
- traume
- andre orale funn

vennligst noter

- behandlingsvegring
- samspill med foresatte
- unormal oppførelse hos barnet
- annet

vennligst noter

---

## Hvilken tilbakemelding har du fått fra barnevernet på den tiende bekymringsmeldingen du sendte?

- barnevernet har åpnet undersøkelse, og iverksett tiltak
- barnevernet har åpnet undersøkelse, men henlagt senere
- barnevernet har åpnet undersøkelse, men ikke gitt tilbakemelding om det er iverksatt tiltak eller om saken er henlagt
- barnevernet har ikke åpnet undersøkelse. Saken henlagt
- barnevernet har ikke gitt noen tilbakemelding
- annet

vennligst noter

- vet ikke

## Har du noe du ønsker å kommentere når det gjelder bekymringsmeldinger?

Vennligst utdyp

## I løpet av den tiden du har arbeidet som tannhelsepersonell, har du noen gang unnlatt å sende bekymringsmelding selv om du har hatt mistanke om barnemishandling eller omsorgssvikt?

ja

Omtrent hvor mange ganger har  du unnlatt å sende bekymringsmelding? Skriv inn siffer.

nei

## Hva var grunnene til at du unnlot å sende bekymringsmelding til barnevernet i de tilfellene du hadde mistanke om barnemishandling eller omsorgssvikt?

|                                                                     | Stemmer helt          | Stemmer litt          | Stemmer ikke          | Vet ikke              |
|---------------------------------------------------------------------|-----------------------|-----------------------|-----------------------|-----------------------|
| var usikker på egne vurderinger                                     | <input type="radio"/> | <input type="radio"/> | <input type="radio"/> | <input type="radio"/> |
| hadde ingen å diskutere bekymringen med                             | <input type="radio"/> | <input type="radio"/> | <input type="radio"/> | <input type="radio"/> |
| hindret av taushetsplikt                                            | <input type="radio"/> | <input type="radio"/> | <input type="radio"/> | <input type="radio"/> |
| hadde ikke nok kunnskap om barnemishandling og omsorgssvikt         | <input type="radio"/> | <input type="radio"/> | <input type="radio"/> | <input type="radio"/> |
| var usikker på hvordan en sender bekymringsmelding                  | <input type="radio"/> | <input type="radio"/> | <input type="radio"/> | <input type="radio"/> |
| var usikker på hvor bekymringsmeldingen skulle sendes               | <input type="radio"/> | <input type="radio"/> | <input type="radio"/> | <input type="radio"/> |
| var usikker på hvordan en skulle dokumentere funnene/ mistanken     | <input type="radio"/> | <input type="radio"/> | <input type="radio"/> | <input type="radio"/> |
| var redd for hva som ville skje med barnet                          | <input type="radio"/> | <input type="radio"/> | <input type="radio"/> | <input type="radio"/> |
| var redd for hva som ville skje med foreldrene                      | <input type="radio"/> | <input type="radio"/> | <input type="radio"/> | <input type="radio"/> |
| var redd for hvilke konsekvenser det ville få for familien          | <input type="radio"/> | <input type="radio"/> | <input type="radio"/> | <input type="radio"/> |
| var redd for foreldrenes reaksjon                                   | <input type="radio"/> | <input type="radio"/> | <input type="radio"/> | <input type="radio"/> |
| var redd for å få trusler                                           | <input type="radio"/> | <input type="radio"/> | <input type="radio"/> | <input type="radio"/> |
| var redd for hvordan barnevernet ville håndtere bekymringsmeldingen | <input type="radio"/> | <input type="radio"/> | <input type="radio"/> | <input type="radio"/> |
| ubehagelig å melde siden en ikke kan være anonym                    | <input type="radio"/> | <input type="radio"/> | <input type="radio"/> | <input type="radio"/> |
| var redd for at barnet ville slutte å gå til tannklinikken          | <input type="radio"/> | <input type="radio"/> | <input type="radio"/> | <input type="radio"/> |
| var redd for tannklinikken sitt rykte i lokalsamfunnet              | <input type="radio"/> | <input type="radio"/> | <input type="radio"/> | <input type="radio"/> |
| manglet støtte fra klinikk sjef (evt nærmeste leder)                | <input type="radio"/> | <input type="radio"/> | <input type="radio"/> | <input type="radio"/> |
| hadde ikke rutiner for å sende bekymringsmeldinger                  | <input type="radio"/> | <input type="radio"/> | <input type="radio"/> | <input type="radio"/> |
| annet                                                               | <input type="radio"/> | <input type="radio"/> | <input type="radio"/> | <input type="radio"/> |

## Hvilke andre grunner hadde du for å unnlate å melde?

Vennligst kommenter.

**De neste spørsmål omhandler dine erfaringer med opplæring innen tematikken barnemishandling og omsorgssvikt.**

### Fikk du opplæring i tematikken barnemishandling, omsorgssvikt og meldeplikt til barnevernet under din utdanning?

- ja
- nei
- vet ikke

### Fra og med 2012, hvilke år har du jobbet som tannhelsepersonell i den offentlige tannhelsetjenesten?

*Kryss av for årene du har jobbet som tannhelsepersonell i den offentlige tannhelsetjenesten.*

- 2012
- 2013
- 2014

### Fra og med 2012 og frem til i dag, har du i forbindelse med ditt arbeid som tannhelsepersonell deltatt på opplæring/kurs/samarbeidsmøter relatert til tematikken barnemishandling, omsorgssvikt og barnevern?

*Dersom ja, omtrent hvor mange dager?*

- ja, 1 dag eller mindre
- ja, 2 - 4 dager
- ja, 5 dager eller mer
- nei
- vet ikke

### Hvor dårlig eller god var kvaliteten på opplæringen du har fått fra og med 2012 og frem til i dag?

- veldig dårlig
- dårlig
- litt dårlig
- verken dårlig eller god
- litt god
- god
- veldig god

## Har du behov for mer opplæring på rutiner for å sende bekymringsmeldinger til barnevernet?

- nei, ikke behov for mer opplæring
  - usikker
  - ja, har behov for litt mer opplæring
  - ja, har behov for mer opplæring
  - ja har behov for mye mer opplæring
- 

## Har du behov for mer opplæring innen temaet barnemishandling og omsorgssvikt?

- nei, ikke behov for mer opplæring
  - usikker
  - ja, har behov for litt mer opplæring
  - ja, har behov for mer opplæring
  - ja har behov for mye mer opplæring
- 

## Har du kjennskap til hvem som arbeider i det kommunale barnevernet i kommunen der tannklinikken er lokalisert ?

- ja
  - nei
  - vet ikke
- 

## Har du fått kjennskapen om hvem som jobber i barnevernet gjennom din jobb som tannhelsepersonell?

- ja
  - nei
  - vet ikke
- 

## Vennligst kryss av for de følgende spørsmål om rutiner og samarbeid med barnevernet.

|                                                                                                                                                             | ja                    | nei                   | vet ikke              |
|-------------------------------------------------------------------------------------------------------------------------------------------------------------|-----------------------|-----------------------|-----------------------|
| Har din tannklinikk skriftlig samarbeidsavtale med det lokale barnevernet?                                                                                  | <input type="radio"/> | <input type="radio"/> | <input type="radio"/> |
| Har du i forbindelse med ditt arbeid deltatt på møte med barnevernet?                                                                                       | <input type="radio"/> | <input type="radio"/> | <input type="radio"/> |
| Har din tannklinikk skriftlige rutiner for hvordan en skal sende bekymringsmeldinger?                                                                       | <input type="radio"/> | <input type="radio"/> | <input type="radio"/> |
| Har din tannklinikk brevmal for sending av bekymringsmelding til barnevernet?                                                                               | <input type="radio"/> | <input type="radio"/> | <input type="radio"/> |
| Har tannhelsetjenesten i ditt fylke etablert egen ressursperson/ressursteam knyttet opp til tematikken barnemishandling, omsorgssvikt og bekymringsmelding? | <input type="radio"/> | <input type="radio"/> | <input type="radio"/> |

---



## Hvordan er rutinene for sending av bekymringsmelding på din klinikk, hvem har ansvar for å sende bekymringsmeldingen?

- hver enkelt har ansvar for å sende sin bekymringsmelding
- klinikkssjef sender alle bekymringsmeldingene
- sekretær sender alle bekymringsmeldingene
- annet

vennligst kommenter

## Du har vært i kontakt med barnevernet i forbindelse med bekymringsmelding. Sett under ett, hvor dårlig eller god opplevde du...

|                                                                          | veldig dårlig         | dårlig                | verken dårlig eller god | god                   | veldig god            |
|--------------------------------------------------------------------------|-----------------------|-----------------------|-------------------------|-----------------------|-----------------------|
| barnevernets veiledning underveis i meldeprosessen?                      | <input type="radio"/> | <input type="radio"/> | <input type="radio"/>   | <input type="radio"/> | <input type="radio"/> |
| barnevernets forståelse av tannklinikken bekymring?                      | <input type="radio"/> | <input type="radio"/> | <input type="radio"/>   | <input type="radio"/> | <input type="radio"/> |
| barnevernets tilbakemelding til tannklinikken om utfallet av meldingene? | <input type="radio"/> | <input type="radio"/> | <input type="radio"/>   | <input type="radio"/> | <input type="radio"/> |

## Fra og med 2012 og frem til i dag, har du mottatt forespørsler fra barnevernet på pasienter som er under utredning hos barnevernet?

- ja

vennligst før opp hvor mange forespørsler du har mottatt fra barnevernet? Skriv inn siffer

- nei

## De neste spørsmål omhandler din generelle oppfatning av barnevernet.

### Hvor uviktig eller viktig samarbeidspart mener du at barnevernet er for tannhelsetjenesten?

Som samarbeidspart er barnevernet...

- veldig uviktig
- uviktig
- verken viktig eller uviktig
- litt viktig
- veldig viktig

## Hvilken mistillit eller tillit har du til barnevernet?

*Til barnevernet har jeg...*

- fullstendig mistillit
  - mistillit
  - verken tilitt eller mistillit
  - tilitt
  - fullstendig tillit
- 

## Hvor lukket eller åpent opplever du som tannhelsepersonell barnevernet?

*Jeg opplever barnevernet som...*

- helt lukket
  - lukket
  - verken åpent eller lukket
  - åpent
  - helt åpent
- 

## Hvilken mangel på respekt eller respekt har du når det gjelder barnevernet?

*Når det gjelder barnevernet har jeg...*

- stor mangel på respekt
  - mangel på respekt
  - verken respekt eller mangel på respekt
  - respekt
  - stor respekt
- 

## Sett under ett hvor misfornøyd eller fornøyd er du med barnevernet?

*Med barnevernet er jeg...*

- veldig misfornøyd
  - misfornøyd
  - verken fornøyd eller misfornøyd
  - fornøyd
  - veldig fornøyd
- 

## Dersom du har noen utfyllende kommentarer på samarbeidet med barnevernet vennligst kommenter.

Kommentar

---

**Din tannklinikk har samarbeidsavtale med barnevernet. De neste spørsmål omhandler samarbeidsavtalen.**

**Har samarbeidsavtalen bidratt til å gjøre det vanskeligere eller enklere for deg å kontakte barnevernet?**

*Samarbeidsavtalen har gjort det å kontakte barnevernet...*

- mye vanskeligere
- vanskeligere
- verken enklere eller vanskeligere
- enklere
- mye enklere

**Har samarbeidsavtalen bidratt til å etablere mistillit eller tillit til barnevernet?**

*For meg har samarbeidsavtalen har bidratt til å etablere...*

- fullstendig mistillit
- mistillit
- verken tillit eller mistillit
- tillit
- fullstendig tillit

**Opplever du at samarbeidsavtalen har redusert eller økt den gjensidige forståelsen for hvordan barnevernet og tannhelsetjenesten arbeider?**

*Samarbeidsavtalen har ført til...*

- stor reduksjon i forståelsen
- reduksjon i forståelsen
- verken økt eller redusert forståelse
- økning i forståelsen
- stor økning i forståelsen

**Tannklinikken kan få forespørsler fra barnevernet på barn som er under utredning. Opplever du at samarbeidsavtalen har bidratt til en reduksjon eller økning i antall forespørsler fra barnevernet?**

*Jeg opplever at samarbeidsavtalen har bidratt til...*

- stor reduksjon i antall forespørsler
- reduksjon i antall forespørsler
- verken økt eller redusert antall forespørsler
- økning i antall forespørsler
- stor økning i antall forespørsler

**Hvor misfornøyd eller fornøyd er du med samarbeidsavtalen?**

*Med samarbeidsavtalen er jeg...*

- veldig misfornøyd
- misfornøyd
- verken fornøyd eller misfornøyd
- fornøyd
- veldig fornøyd

## Hvor dårlig eller godt kjenner du til innholdet i samarbeidsavtalen med barnevernet?

*Jeg kjenner innholdet i samarbeidsavtalen...*

- veldig dårlig
  - dårlig
  - verken godt eller dårlig
  - godt
  - veldig godt
- 

### De neste spørsmål omhandler tannklinikkenes skriftlige rutiner for sending av bekymringsmelding

## Din tannklinikk har skriftlige rutiner for når og hvordan en sender bekymringsmelding til barnevernet. Har rutinene gjort deg mer usikker eller tryggere på å sende bekymringsmelding?

*Rutinene har gjort meg...*

- mye mer usikker
  - usikker
  - verken sikker eller usikker
  - sikrere
  - mye sikrere
- 

## Din tannklinikk har skriftlige rutiner for å sende bekymringsmelding. Har rutinene gjort det vanskeligere eller enklere å sende en bekymringsmelding?

*Jeg opplever at rutinene har gjort det...*

- mye vanskeligere
  - vanskeligere
  - verken enklere eller vanskeligere
  - enklere
  - mye enklere
- 

## Din tannklinikk har skriftlige rutiner for sending av bekymringsmelding. Har rutinene ført til økt eller redusert belastning for tannhelsepersonell?

*Jeg opplever at rutinene har ført til...*

- veldig økt belastning
  - økt belastning
  - verken økt eller reduser belastning
  - redusert belastning
  - veldig redusert belastning
-

**Din tannklinikk har skriftlige rutiner for sending av bekymringsmelding. Har rutinene bidratt til å svekke eller øke din bevissthet i forhold til helsepersonell sin meldeplikt til barnevernet?**

*Rutinene har bidratt til å...*

- svekke min bevissthet mye
  - svekke min bevissthet
  - verken økt eller svekket min bevissthet
  - økt min bevissthet
  - økt min bevissthet mye
- 

**Hvor misfornøyd eller fornøyd er du med de skriftlige rutiner for sending av bekymringsmelding?**

*Med rutinene er jeg...*

- veldig misfornøyd
  - misfornøyd
  - verken fornøyd eller misfornøyd
  - fornøyd
  - veldig fornøyd
- 

**Hvor dårlig eller godt kjenner du rutinene for sending av bekymringsmelding?**

*Jeg kjenner rutinene...*

- veldig dårlig
  - dårlig
  - verken godt eller dårlig
  - godt
  - veldig godt
- 

**Tannhelsetjenesten i ditt fylke har etablert egen ressursperson/ressursteam som er knyttet opp til tematikken barnemishandling, omsorgssvikt og barnevernet.**

**Opplever du det å kunne diskutere faglige funn og opplevelser med en ressursperson/ressursteam i egen organisasjon som unyttig eller nyttig?**

*Jeg opplever det å ha egen ressursperson/ressursteam som ...*

- veldig unyttig
  - unyttig
  - verken nyttig eller unyttig
  - nyttig
  - veldig nyttig
-

## De neste spørsmål omhandler helsepersonell sin taushetsplikt og meldeplikt.

### Hvor usikker eller sikker er du ...

|                                                                                                                                            | veldig usikker        | usikker               | verken usikker eller sikker | sikker                | veldig sikker         |
|--------------------------------------------------------------------------------------------------------------------------------------------|-----------------------|-----------------------|-----------------------------|-----------------------|-----------------------|
| når det gjelder taushetsplikten og hvilke opplysninger du kan oppgi til barnevernet dersom du sender en bekymringsmelding?                 | <input type="radio"/> | <input type="radio"/> | <input type="radio"/>       | <input type="radio"/> | <input type="radio"/> |
| når det gjelder taushetsplikten og hvilke opplysninger du kan utgi dersom barnevernet henvender seg til deg angående en av dine pasienter? | <input type="radio"/> | <input type="radio"/> | <input type="radio"/>       | <input type="radio"/> | <input type="radio"/> |
| på taushetsplikten i mellom ulike tjenester (eks. tannklinik, helsestasjon, barnehage, skole, barnevern)?                                  | <input type="radio"/> | <input type="radio"/> | <input type="radio"/>       | <input type="radio"/> | <input type="radio"/> |
| i forhold til i hvilke tilfeller foresatte skal informeres om at du sender en bekymringsmelding?                                           | <input type="radio"/> | <input type="radio"/> | <input type="radio"/>       | <input type="radio"/> | <input type="radio"/> |

### Hvor usikker eller sikker føler du deg...

|                                                | veldig usikker        | usikker               | verken usikker eller sikker | sikker                | veldig sikker         |
|------------------------------------------------|-----------------------|-----------------------|-----------------------------|-----------------------|-----------------------|
| på når en skal sende en bekymringsmelding?     | <input type="radio"/> | <input type="radio"/> | <input type="radio"/>       | <input type="radio"/> | <input type="radio"/> |
| på hvordan en skal sende en bekymringsmelding? | <input type="radio"/> | <input type="radio"/> | <input type="radio"/>       | <input type="radio"/> | <input type="radio"/> |
| på innholdet i helsepersonell loven §33        | <input type="radio"/> | <input type="radio"/> | <input type="radio"/>       | <input type="radio"/> | <input type="radio"/> |

## De neste spørsmål omhandler din bakgrunn.

### I hvilket fylke er du ansatt?

- Aust Agder
- Buskerud
- Finnmark
- Hedmark
- Hordaland
- Møre og Romsdal
- Nordland
- Nord-Trøndelag
- Oppland
- Oslo
- Rogaland
- Sogn og Fjordane
- Sør-Trøndelag
- Telemark
- Troms
- Vest Agder
- Vestfold
- Østfold

## Hva er din nåværende stilling i tannhelsetjenesten?

- tannpleier
- tannpleier med ledelsesoppgaver (klinikkleder, distriktsleder, direktør)
- tannlege
- spesialisttannlege
- tannlege med ledelsesoppgaver (klinikkleder, distriktsleder, overtannlege, direktør, fylkestannlege)
- annet

vennligst spesifiser

---

## Hvor mange år har du vært tilsatt i den offentlige tannhelsetjenesten?

Vennligst oppgi hele år. Dersom det er mindre enn ett år, skriv inn 0

År tilsatt i tannhelsetjenesten.

Skriv inn siffer

---

## Hvilket kjønn er du?

- kvinne
- mann

---

## Hvilken alderskategori tilhører du?

- 20 - 29 år
- 30 - 39 år
- 40 - 49 år
- 50 - 59 år
- 60 - 69 år
- 70 -

---

## Totalt hvor mange tilsette (tannhelsesekretærer, tannpleiere og tannleger) er det på din tannklinikk?

Dersom du jobber på flere steder, oppgi antall på den klinikken du jobber mest.

- 1-3
  - 4-6
  - 7-9
  - 10-14
  - 15-19
  - 20-24
  - 25-29
  - 30+
-

## Hvor mange innbyggere er det i kommunen tannklinikken er lokalisert?

*Dersom du jobber ved flere tannklinikker vennligst oppgi for den klinikken du jobber mest.*

- 0 - 5000
- 5001 - 10.000
- 10.001 - 15.000
- 15.001 - 20.000
- 20.001 - 40.000
- 40.001 - 80.000
- 80.001+

---

## Omtrent hvor mange pasienter under 18 år har du undersøkt eller behandlet siste 12 måneder?

- 0 - 250
- 251 - 500
- 501 - 750
- 751 - 1000
- 1001 - 1250
- 1251 - 1500
- 1501 +

---

## Har du andre kommentarer relatert til tema "tannhelse og barnevern" kan du gjerne utdype dette her:

Kommentar

---

## Hjertelig takk for din deltakelse.

*Spørreundersøkelsen er nå fullført.*

*Takk!*

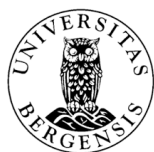

UNIVERSITETET I BERGEN  
HEMIL-senteret  
Senter for forskning om helsefremmende arbeid,  
miljø og livsstil

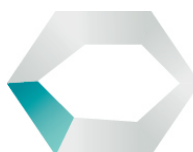

Tannhelsetjenestens  
kompetansesenter  
Vest / Hordaland
